# Supplementary material
Source: PubMed Central journal article supplement (PMC6367190)
Supplement: rspb20182193supp1.pdf [file rspb20182193supp1.pdf]

Barbaro L, Allan E, Ampoorter E, Castagneyrol B, Charbonnier Y, De Wandeler H, Kerbiriou C., Milligan HT, Vialatte A, Carnol M, Deconchat M, De Smedt P, Jactel H, Koricheva J, Le Viol I, Muys B, Scherer-Lorenzen M, Verheyen K, van der Plas F. 2019 Biotic predictors complement models of bat and bird responses to climate and tree diversity in European forests. *Proc. R. Soc. B*  
<http://dx.doi.org/10.1098/rspb.2019>.

**Supplement S1. Location map of sampled forest plots of the FunDivEurope exploratory platform in Europe, spread across Spain, Italy, Romania, Germany, Poland and Finland (N = 209). The regional pool of tree species sampled and the number of plots per country are indicated.**

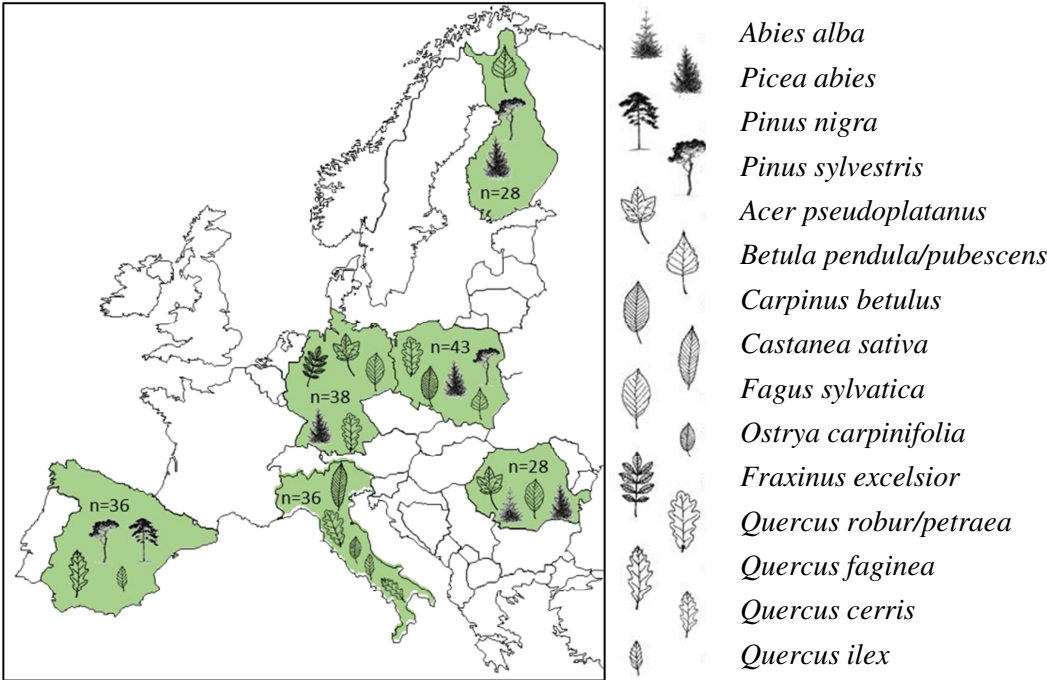

## Supplement S2. Calculating species diversity rarefaction curves using Hill number

We performed rarefaction and extrapolation curves for bird species diversity, in order to insure that the observed patterns were not only due to the lower species pool with increasing latitude (Chao et al. 2014a) using R-package iNEXT (Hsieh et al. 2016). The Hill number of order 1 allows calculating the effective number of species and is equivalent to the exponential of Shannon entropy (Chao et al. 2014b, Morante-Filho et al. 2018). It is not sensible to changes in sample coverage since each species is weighted according to its abundance in the community, and can be seen as the number of common or typical species in a given community (Jost 2007). We found that there was overall a rather good estimation of species diversity and sample coverage (figures 1 and 2) except for bats in Finland where regional species pool fall to  $N = 3$  species due to bioclimatic limitations (Charbonnier et al. 2016).

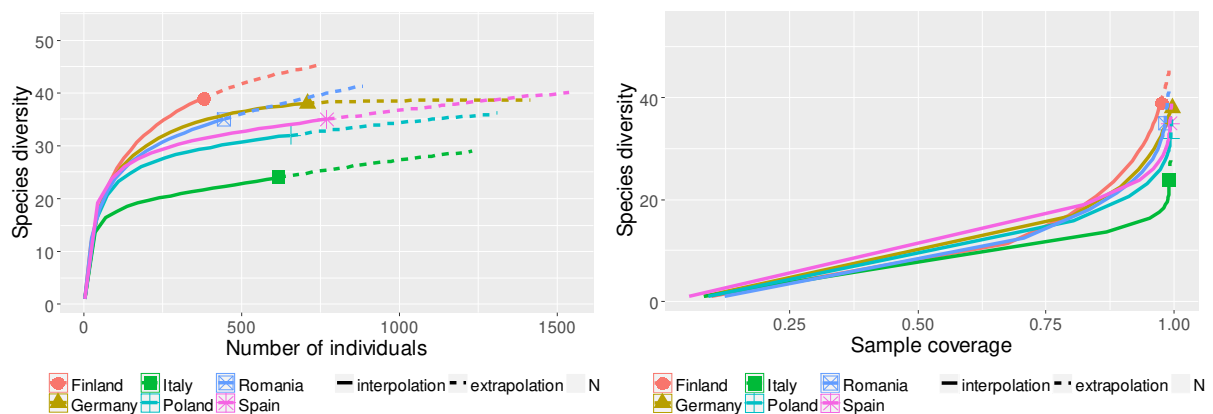

**Fig. S2a** Bird species diversity rarefaction and extrapolation curves using Hill number of order 1

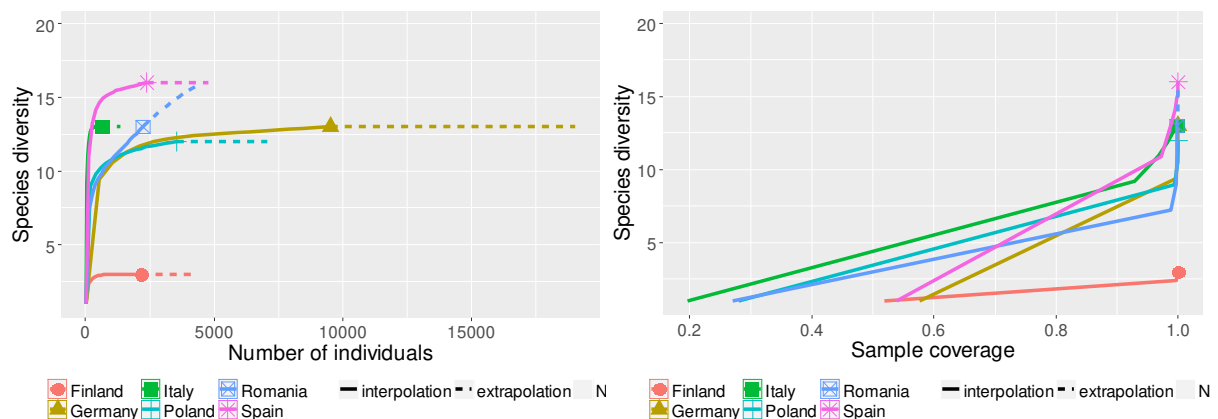

**Fig. S2b** Bat species diversity rarefaction and extrapolation curves using Hill number of order 1

## References

- Chao, A., Gotelli, N.J., Hsieh, T.C., Sander, E.L., Ma, K.H., Colwell, R.K. & Ellison, A.M. 2014a Rarefaction and extrapolation with Hill numbers: a framework for sampling and estimation in species diversity studies. *Ecological Monographs* 84, 45-67.
- Chao, A., Chiu, C. H., & Jost, L. 2014b Unifying species diversity, phylogenetic diversity, functional diversity, and related similarity and differentiation measures through Hill numbers. *Annual Review of Ecology, Evolution, and Systematics* 45, 297-324.
- Charbonnier Y., Barbaro L., Barnagaud J.Y., Ampoorter E., Nezan J., Verheyen K., Jactel H. 2016 Bat and bird diversity along independent gradients of latitude and tree composition in European forests. *Oecologia* 182, 529–537.
- Hsieh, T.C., Ma, K.H. & Chao, A. 2016 iNEXT: An R package for rarefaction and extrapolation of species diversity (Hill numbers). *Methods in Ecology and Evolution* 7, 1451-1456.
- Jost, L. 2007. Partitioning diversity into independent alpha and beta components. *Ecology* 88, 2427–2439.
- Morante-Filho JM et al. 2018 Direct and cascading effects of landscape structure on tropical forest and non-forest frugivorous birds. *Ecological Applications*, in press

### Supplement S3. Bat and bird species categorical traits

| Species | forag | diet   | nurse | migr  | date | home       |
|---------|-------|--------|-------|-------|------|------------|
| BARBAR  | edge  | spec   | tree  | resid | may  | small      |
| EPTNIL  | open  | interm | build | short | july | large      |
| EPTSER  | edge  | gener  | build | resid | july | large      |
| HYPNAV  | open  | gener  | cave  | short | july | large      |
| MINSCH  | open  | interm | cave  | short | june | very large |
| MYOBEC  | glean | interm | tree  | resid | may  | small      |
| MYOBRA  | edge  | gener  | tree  | resid | june | small      |
| MYODAU  | open  | gener  | tree  | resid | june | mid        |
| MYOEMA  | glean | spec   | build | resid | july | small      |
| MYOBYL  | mixed | interm | build | resid | july | large      |
| MYOMYO  | mixed | interm | build | short | july | large      |
| MYONAT  | glean | gener  | tree  | resid | july | mid        |
| MYOESC  | glean | gener  | tree  | resid | july | mid        |
| NYCLAS  | open  | gener  | tree  | long  | june | very large |
| NYCLEI  | open  | gener  | tree  | long  | june | large      |
| NYCNOC  | open  | gener  | tree  | long  | july | very large |
| PIPKUH  | edge  | gener  | build | resid | may  | mid        |
| PIP NAT | edge  | interm | tree  | long  | may  | mid        |
| PIPPIP  | edge  | gener  | build | resid | june | mid        |
| PIPPYG  | edge  | gener  | build | short | june | mid        |
| PLEAUR  | glean | spec   | tree  | resid | july | small      |
| PLEAUS  | mixed | spec   | build | resid | june | small      |
| RHIEUR  | mixed | spec   | cave  | resid | july | very large |
| RHIFER  | mixed | interm | build | resid | july | very large |
| RHIHIP  | mixed | gener  | build | resid | july | mid        |
| TADTEN  | open  | interm | cave  | resid | july | small      |
| VESMUR  | open  | interm | build | long  | may  | large      |

**Table S3a.** Bat categorical traits used for computing FDiv metrics (species codes use first three letters of genus and species scientific names). Trait codes and categories are listed in table S2b.

| Trait                         | Category               | Reference           |
|-------------------------------|------------------------|---------------------|
| Foraging methods<br>(forag)   | Gleaning               | Dietz et al. (2009) |
|                               | Edge foragers          |                     |
|                               | Open foragers          |                     |
| Diet specialization<br>(diet) | Generalist             | Dietz et al. (2009) |
|                               | Intermediate           |                     |
|                               | Specialist             |                     |
| Nursery site<br>(nurse)       | Building               | Dietz et al. (2009) |
|                               | Cave and rock          |                     |
|                               | Tree                   |                     |
| Migration<br>(migr)           | Resident               | Dietz et al. (2009) |
|                               | Short-distance migrant |                     |
|                               | Long-distance migrant  |                     |
| Average birth date<br>(date)  | May                    | Dietz et al. (2009) |
|                               | June                   |                     |
|                               | July                   |                     |
| Home-range size<br>(home)     | Small <100 ha          | Dietz et al. (2009) |
|                               | Mid 101-500 ha         |                     |
|                               | Large 501-2000 ha      |                     |
|                               | Very large >2000 ha    |                     |

**Table S3b.** Codes for categories of bat species categorical traits.

## References

Dietz, C et al. 2009 Bats of Britain, Europe and Northwest Africa. A & C Black.

| Species | forag  | diet   | nest   | migr  | date    | home  |
|---------|--------|--------|--------|-------|---------|-------|
| AEGCAU  | under  | insect | shrub  | resid | march   | small |
| ALAAARV | ground | mixed  | ground | short | earlapr | small |
| ALERUF  | ground | mixed  | ground | resid | may     | large |
| ANTTRI  | ground | insect | ground | long  | lateapr | mid   |
| BONBON  | ground | mixed  | ground | resid | earlapr | large |
| CARCAR  | under  | seeds  | shrub  | short | lateapr | small |
| CARCHL  | under  | seeds  | shrub  | resid | earlapr | mid   |
| CARSPI  | canopy | seeds  | tree   | short | lateapr | mid   |
| CERBRA  | bark   | insect | cavity | resid | earlapr | small |
| CERFAM  | bark   | insect | cavity | resid | lateapr | small |
| COCCOC  | canopy | mixed  | tree   | short | lateapr | large |
| COLOEN  | ground | seeds  | cavity | short | lateapr | large |
| COLPAL  | ground | seeds  | tree   | short | lateapr | large |
| CORONE  | ground | mixed  | tree   | resid | earlapr | large |
| CORRAX  | ground | mixed  | tree   | resid | march   | large |
| CUCCAN  | canopy | insect | ground | long  | june    | large |
| DENLEU  | bark   | insect | cavity | resid | lateapr | large |
| DENMAJ  | bark   | insect | cavity | resid | earlapr | large |
| DENMED  | bark   | insect | cavity | resid | lateapr | large |
| DRYMAR  | bark   | insect | cavity | resid | lateapr | large |
| EMBCIA  | ground | mixed  | ground | resid | lateapr | small |
| EMBCIR  | ground | mixed  | ground | resid | may     | small |
| EMBCIT  | ground | mixed  | ground | resid | may     | small |
| ERIRUB  | under  | mixed  | ground | short | lateapr | mid   |
| FICALB  | canopy | insect | cavity | long  | may     | small |
| FICHYP  | canopy | insect | cavity | long  | may     | small |
| FICPAR  | canopy | insect | cavity | long  | june    | small |
| FRICOE  | canopy | mixed  | tree   | short | earlapr | small |
| GALGAL  | prober | mixed  | ground | short | lateapr | large |
| GARGLA  | under  | mixed  | tree   | resid | earlapr | large |
| JYNTOR  | prober | insect | cavity | long  | earlapr | mid   |
| LOXCUR  | canopy | seeds  | tree   | short | march   | large |
| LULARB  | ground | insect | ground | resid | march   | mid   |
| LUSMEG  | under  | insect | ground | long  | lateapr | mid   |
| LYRTET  | ground | mixed  | ground | resid | june    | large |
| MUSSTR  | canopy | insect | cavity | long  | june    | small |
| ORIORI  | canopy | insect | tree   | long  | june    | large |
| PARATE  | canopy | insect | cavity | short | may     | small |
| PARCAE  | canopy | insect | cavity | short | earlapr | small |
| PARCRI  | canopy | mixed  | cavity | resid | earlapr | mid   |
| PARMAJ  | canopy | insect | cavity | resid | earlapr | small |
| PARMON  | canopy | mixed  | cavity | resid | may     | small |
| PARPAL  | canopy | mixed  | cavity | resid | may     | small |
| PHOPHO  | canopy | insect | cavity | long  | may     | mid   |
| PHYBON  | canopy | insect | ground | long  | may     | small |
| PHYCOL  | canopy | insect | ground | short | lateapr | small |
| PHYDES  | canopy | insect | ground | long  | june    | small |
| PHYLUS  | canopy | insect | ground | long  | june    | small |
| PHYSIB  | canopy | insect | ground | long  | june    | small |
| PICCAN  | prober | insect | cavity | resid | june    | large |
| PICVIR  | prober | insect | cavity | resid | lateapr | large |
| PRUMOD  | ground | insect | ground | short | lateapr | small |
| PYRPYR  | under  | seeds  | tree   | resid | may     | mid   |
| PYRRAX  | prober | mixed  | cavity | resid | lateapr | large |
| REGIGN  | canopy | insect | tree   | resid | may     | small |
| REGREG  | canopy | insect | tree   | short | may     | small |
| SERCIT  | ground | seeds  | tree   | short | lateapr | mid   |
| SERSER  | ground | seeds  | tree   | short | may     | small |
| SITEUR  | bark   | insect | cavity | resid | lateapr | mid   |
| STUVUL  | prober | mixed  | cavity | short | earlapr | mid   |
| SYLATR  | under  | mixed  | shrub  | short | lateapr | small |
| SYLBOR  | under  | mixed  | shrub  | long  | june    | small |
| SYLCAN  | under  | insect | shrub  | long  | may     | small |
| SYLCUR  | under  | insect | shrub  | long  | june    | small |
| TRINEB  | prober | insect | ground | short | may     | large |
| TRIOCH  | prober | insect | tree   | short | may     | large |
| TROTRO  | ground | insect | ground | resid | may     | small |
| TURILI  | prober | mixed  | shrub  | short | lateapr | mid   |
| TURMER  | prober | mixed  | shrub  | short | march   | mid   |
| TURPHI  | prober | mixed  | tree   | short | march   | mid   |
| TURPIL  | prober | mixed  | tree   | short | earlapr | mid   |
| TURVIS  | prober | mixed  | tree   | short | march   | mid   |
| UPUEPO  | prober | insect | cavity | long  | lateapr | large |

**Table S3c.** Bird species categorical traits used for computing FDiv metrics (species codes use first three letters of genus and species scientific names). Trait codes and categories are listed in table S2d.

| Trait                         | Category                          | Reference                     |
|-------------------------------|-----------------------------------|-------------------------------|
| Foraging methods<br>(forag)   | Ground prober                     | Barbaro and van Halder (2009) |
|                               | Ground gleaner                    |                               |
|                               | Understory gleaner                |                               |
|                               | Canopy foliage gleaner or hawkler |                               |
|                               | Bark forager                      |                               |
| Diet<br>(diet)                | Insectivore                       | Cramp et al. (1994)           |
|                               | Mixed diet                        |                               |
|                               | Granivore                         |                               |
| Nest site location<br>(nest)  | Cavity                            | Cramp et al. (1994)           |
|                               | Open, in tree                     |                               |
|                               | Open, in shrub                    |                               |
|                               | Open, on ground                   |                               |
| Migration<br>(migr)           | Resident                          | Cramp et al. (1994)           |
|                               | Short-distance migrant            |                               |
|                               | Long-distance migrant             |                               |
| Average laying date<br>(date) | March                             | Barbaro and van Halder (2009) |
|                               | Early April                       |                               |
|                               | Late April                        |                               |
|                               | Early May                         |                               |
|                               | Late May and June                 |                               |
| Home-range size<br>(home)     | < 1 ha                            | Barbaro and van Halder (2009) |
|                               | 1-4 ha                            |                               |
|                               | > 4 ha                            |                               |

**Table S3d.** Codes for categories of bird species categorical traits.

## References

- Barbaro, L, van Halder, I. 2009 Linking bird, carabid beetle and butterfly life-history traits to habitat fragmentation in mosaic landscapes. *Ecography* 32, 321–333.
- Cramp, S. et al. 1994 *Handbook of the birds of Europe, the Middle East and North Africa: the birds of the Western Palearctic*. Oxford University Press.



## Supplement S4. Species Thermal Indices for European bats

The distribution maps of European bats were obtained from the Atlas of European Mammals (Mitchell-Jones et al. 1999; accessed from the European Environment Agency at <http://eunis.eea.europa.eu>), using grid cells of 50 × 50 km. According to recent changes in the knowledge of bat distribution, including taxonomic changes (i.e., *Myotis* spp, *Eptesicus* spp, *Plecotus* spp), we updated these distribution maps using a set of recent publications (Evin et al. 2009, Garcia-Mudarra et al. 2009, Ibáñez et al. 2006, Juste et al. 2012, Puechmaille et al. 2012, Rebelo et al. 2010, Salicini et al. 2011, 2013, Santos et al. 2014).

| Species                           | Number of cells | Thermal range | Thermal centroid |
|-----------------------------------|-----------------|---------------|------------------|
| <i>Barbastella barbastellus</i>   | 588             | 14.88         | 9.07             |
| <i>Eptesicus nilssonii</i>        | 665             | 13.31         | 4.34             |
| <i>Eptesicus serotinus</i> *      | 883             | 16.27         | 9.43             |
| <i>Hypsugo savii</i>              | 244             | 15.82         | 11.76            |
| <i>Miniopterus schreibersii</i>   | 442             | 13.23         | 12.30            |
| <i>Myotis bechsteinii</i>         | 436             | 12.99         | 9.37             |
| <i>Myotis blythii</i>             | 346             | 16.92         | 11.10            |
| <i>Myotis brandtii</i>            | 464             | 10.88         | 6.67             |
| <i>Myotis daubentonii</i>         | 1127            | 17.85         | 8.30             |
| <i>Myotis emarginatus</i>         | 412             | 14.62         | 10.69            |
| <i>Myotis escaleraei</i>          | 78              | 8.80          | 13.40            |
| <i>Myotis myotis</i>              | 873             | 16.66         | 10.01            |
| <i>Myotis nattereri</i> *         | 777             | 15.23         | 8.49             |
| <i>Myotis (nattereri) sp A</i> ** | 216             | 12.48         | 12.47            |
| <i>Nyctalus lasiopterus</i>       | 61              | 9.95          | 12.30            |
| <i>Nyctalus leisleri</i>          | 479             | 16.24         | 9.23             |
| <i>Nyctalus noctula</i>           | 906             | 15.99         | 8.45             |
| <i>Pipistrellus kuhlii</i>        | 394             | 16.57         | 12.28            |
| <i>Pipistrellus nathusii</i>      | 585             | 15.36         | 8.65             |
| <i>Pipistrellus pipistrellus</i>  | 1279            | 18.30         | 9.36             |
| <i>Pipistrellus pygmaeus</i>      | 1740            | 18.69         | 9.75             |
| <i>Plecotus auritus</i>           | 1119            | 15.54         | 8.08             |
| <i>Plecotus austriacus</i>        | 679             | 15.84         | 10.00            |
| <i>Rhinolophus euryale</i>        | 272             | 12.07         | 12.22            |
| <i>Rhinolophus ferrumequinum</i>  | 698             | 16.96         | 11.24            |
| <i>Rhinolophus hipposideros</i>   | 715             | 16.73         | 10.62            |
| <i>Tadarida teniotis</i>          | 216             | 15.75         | 13.12            |
| <i>Vespertilio murinus</i>        | 437             | 12.51         | 3.13             |

\* *sensu stricto* ; \*\**sensu* Salicini et al. (2013)

**Table S4.** Bat Species Thermal Indices (STIs)

We further extracted the mean annual temperature from WorldClim (Hijmans *et al.*, 2005; <http://www.worldclim.org>) within a similar grid than the one used in the Atlas of European Mammals. The total cover of distribution maps for European bats varied between 61 cells for *Nyctalus lasiopterus* and 1740 cells for *Pipistrellus pygmaeus*, while bat thermal ranges ranged from 8.80 in *Myotis escalerai* to 18.69 in *Pipistrellus pygmaeus* (table S3).

## References

- Evin, A. et al. 2009 A new species for the French bat list: *Myotis escalerai* (Chiroptera: Vespertilionidae). *Mammalia* 73: 142–144.
- García-Mudarra, JL. et al. 2009 The Straits of Gibraltar: barrier or bridge to Ibero-Moroccan bat diversity? *Biological Journal of the Linnean Society* 96: 434–450.
- Hijmans, RJ et al. 2005 Very high resolution interpolated climate surfaces for global land areas. *International Journal of Climatology* 25: 1965–1978.
- Ibáñez, C et al. 2006 The Iberian contribution to cryptic diversity in European bats. - *Acta Chiropterologica* 8: 277–297.
- Juste, J et al. 2012 Phylogeny and systematics of Old World serotine bats (genus *Eptesicus*, Vespertilionidae, Chiroptera). *Zoologica Scripta* 42: 441–457.
- Mitchell-Jones, AJ et al. 1999 *The Atlas of European mammals*. Poyser, London.
- Puechmaille, SJ et al. 2012 Genetic analyses reveal further cryptic lineages within the *Myotis nattereri* species complex. *Mammalian Biology* 77: 224–228.
- Salicini, I et al. 2011 Multilocus phylogeny and species delimitation within the Natterer's bat species complex in the Western Palearctic. *Molecular Phylogenetics and Evolution* 61: 888–898.
- Salicini, I et al. 2013 Deep differentiation between and within Mediterranean glacial refugia in a flying mammal, the *Myotis nattereri* bat complex. *Journal of Biogeography* 40: 1182–1193.
- Santos, H et al. 2014 Influences of ecology and biogeography on shaping the distributions of cryptic species: three bat tales in Iberia. *Biological Journal of the Linnean Society of London* 112: 150–162.

## **Supplement S5. Species Specialization Indices for European bats**

Bat species specialization to habitat indices (SSI) were assessed using an independent dataset from the French National Bat Survey (<http://vigienature.mnhn.fr/page/vigie-chiro>)

### **French National Bat Survey**

Volunteer-based standardized monitoring schemes have been widely implemented in Europe and North America (Jiguet et al. 2012, Barlow et al. 2015, Newson et al. 2015). In France, the National Museum of Natural History (MNHN) initiated the French National Bat Survey (BS) in 2006 (Azam et al. 2016). This scheme provides a dataset of 6774 sites distributed across the country with both habitat features and bat call identifications (28 species and 960 500 bat calls).

### **Sampling methods**

The French National BS asks keen volunteers to count bats twice a year using point-counts or road surveys: once during the period 15<sup>th</sup> June to 31<sup>st</sup> July, and a second time between 15<sup>th</sup> August and 31<sup>st</sup> September. We used data from the road survey protocol to assess the species specialization index (SSI). The choice of the road survey is delegated to the volunteers for safety reasons. The circuit must be covered at night at low speed (recording at constant speed:  $30 \pm 5 \text{ km.h}^{-1}$ ), excluding non-paved roads, roads with a lot of traffic and high-speed roads. All roads selected must be of similar width, ca 10 m. Observers were asked to select a road circuit of at least 30 km and located in a 10 km radius around their home, and not overlapping itself. The second requirement was to design a circuit crossing, as much as possible, the different habitats occurring in the sampled area proportionally to their total area. To avoid biases in habitat sampling (i.e., sampling preferentially the most species-rich habitats), we validated each circuit and defined randomly a starting point on the circuit. Starting from this

point, the circuit was divided into ten 2-km road segments, separated by 1-km road segments in which no recording was performed. Such a sampling design allowed obtaining the best possible correlation between the proportion of each habitat sampled and the proportion of each habitat at the national scale ( $R^2 = 0.94$ ), except for urban areas which were slightly overrepresented in the dataset.

### **Assessing bat habitat specialization**

In the French National Bat Survey, volunteers were involved in collecting habitat variables on a detailed and adapted basis. Habitat features were recorded during the first visit to the circuit. The appropriate habitat codes were chosen from an established hierarchical system that allows describing more than 950 habitat types, as widely used in breeding bird surveys (see Crick 1992 for the UK, and Barnagaud et al. 2012, for the French breeding bird surveys). However, these codes were adapted to take into account bat foraging specifics and particularly the linear landscape elements where bats tend to forage preferentially (for more details about the French National Bat Survey, see <http://vigienature.mnhn.fr/page/relevés-d-habitats>). Habitat classes were collected within a radius of 100m around the sampled points and grouped into 18 classes in order to obtain a sufficient number of samples per habitat class (for more methodological informations, see Julliard et al. 2006, Devictor et al. 2008, Kerbiriou et al. 2010).

### **Bat species specialization index (SSI)**

We quantified bat species specialization index (SSI, table S5) as the level of habitat specialization for a given bat species, as the coefficient of variation ( $SD/mean$ ) of its densities across habitats following Julliard et al. (2006). SSI is thus independent from species habitat preferences. However, we also assessed bat species specialization to forest habitats only, by

calculating a ratio of the mean density of a given species in forest habitats only on the mean density in non-forest habitats.

| Bat species                      | Habitat Specialization Index | Specialization to forest |
|----------------------------------|------------------------------|--------------------------|
| <i>Tadarida teniotis</i>         | 1.941                        | 0.007                    |
| <i>Barbastella barbastellus</i>  | 1.438                        | 0.309                    |
| <i>Eptesicus serotinus</i>       | 1.499                        | 0.586                    |
| <i>Myotis daubentonii</i>        | 2.023                        | 0.053                    |
| <i>Myotis</i> spp.               | 1.739                        | 0.156                    |
| <i>Nyctalus leisleri</i>         | 1.166                        | 0.442                    |
| <i>Nyctalus noctula</i>          | 1.723                        | 0.137                    |
| <i>Hypsugo_savi</i>              | 1.794                        | 0.011                    |
| <i>Pipistrellus kuhlii</i>       | 0.697                        | 0.164                    |
| <i>Pipistrellus nathusii</i>     | 1.676                        | 0.011                    |
| <i>Pipistrellus pipistrellus</i> | 0.702                        | 0.179                    |
| <i>Pipistrellus pygmaeus</i>     | 2.247                        | 0.072                    |
| <i>Plecotus</i> spp.             | 1.717                        | 0.527                    |
| <i>Nyctalus lasiopterus</i>      | 2.517                        | 0.893                    |

**Table S5.** Bat Species Specialization Indices (SSIs)

## References

- Azam, C et al. 2016 Disentangling the relative effect of light pollution, impervious surfaces and intensive agriculture on bat activity with a national-scale monitoring program. *Landscape Ecology* 31: 2471–2483.
- Barataud, M. 2012 *Ecologie acoustique des chiroptères d'Europe*. Biotope, Mèze, Muséum national d'histoire naturelle, Paris.
- Barlow, KE et al. 2015 Citizen science reveals trends in bat populations: the National Bat Monitoring Programme in Great Britain. *Biological Conservation* 182: 14–26.
- Barnagaud, JY et al. 2012 Relating habitat and climatic niches in birds. *PLoS ONE* 7: e32819.
- Crick, HQP. 1992 A bird-habitat coding system for use in Britain and Ireland incorporating aspects of land-management and human activity. *Bird Study* 39: 1-12
- Devictor, V et al. 2008 Distribution of specialist and generalist species along spatial gradients of habitat disturbance and fragmentation. *Oikos* 117: 507–514.

- Jiguet, F et al. 2012 French citizens monitoring ordinary birds provide tools for conservation and ecological sciences. *Acta Oecologica* 44: 58–66.
- Julliard, R et al. 2006 Spatial segregation of specialists and generalists in bird communities. *Ecology Letters* 9: 1237-1244.
- Kerbiriou, C et al. 2010 Long term trends monitoring of bats, from biodiversity indicator production to species specialization assessment. Society for Conservation Biology, 24th Annual Meeting, 3 - 7 July, 2010, Edmonton, Alberta, Canada.
- Newson, SE et al. 2015 A novel citizen science approach for large-scale standardised monitoring of bat activity and distribution, evaluated in eastern England. *Biological Conservation* 191: 38–49.
- Rebelo, H et al. 2010 Predicted impact of climate change on European bats in relation to their biogeographic patterns. *Global Change Biology* 16: 561–576.

## Supplement S6. Null models for functional diversity metrics

We used a null model approach to correct functional diversity metrics for species richness levels and disentangle the drivers of trait diversity from those of taxonomic diversity (Calba et al. 2014, Pellissier et al. 2018). We recalculated 1000 times FD metrics for simulated communities with randomized trait values that were equally species-rich as the observed communities to calculate the standardized deviation of FD ( $FD_{dev}$ ) values as follows:

$$FD_{dev} = \frac{FD_{obs} - \overline{FD_{exp}}}{sd(FD_{exp})},$$

where  $FD_{obs}$  is the observed FD value,  $\overline{FD_{exp}}$  is the average of the 1000 randomized (i.e., expected) FD values and  $sd(FD_{exp})$  is the standard deviation of the 1000 randomized (i.e., expected) FD values.

We found that observed values and simulated values for FD metrics were overall highly correlated, with  $R = 0.77$  for bird functional richness (FRic);  $R = 0.81$  for bird functional evenness (FEve) and  $R = 0.77$  for bat functional evenness;  $R = 0.78$  for bird functional entropy (Rao's  $Q$ ) and  $R = 0.71$  for bat functional entropy;  $R = 0.96$  for bird mean body mass and  $R = 0.80$  for bat mean body mass. Only simulated bat functional richness was less correlated to observed values, with  $R = 0.50$ .

After analyzing  $FD_{dev}$  using the same modelling procedure than for observed FD values (see table S6), we found consistencies in model selection with the same predictors being significant for bird functional entropy (mean precipitation and ungulate browsing), bat functional evenness (insect herbivory), bird mean body mass (mean temperature, mean precipitation and spider abundance) and bat mean body mass (deciduous tree cover, earthworm abundance and ungulate browsing).

On the other hand, we found discrepancies in predictor selection for bird and bat functional richness, bird functional evenness and bat functional entropy. However, as functional richness depends on taxonomic diversity (Laliberté & Legendre 2010), it is not surprising that the pure effect of trait diversity is no more consistent when considered independently from taxonomic

species richness. Moreover, for bat functional richness, the correlation between observed and simulated values was low. Finally, the two poorly-performing models (bird FEve and batRao) were not including biotic predictors in initial models fitted for observed values, but respectively climatic and habitat variables, while in the simulated values, the predictors were instead habitat-related for bird FEve (deciduous tree cover) and biotic-related for bat Rao's Q (earthworm abundance, see table S6).

|              | Significant predictors in best models for observed $FD$ values | Model performance and significant predictors for $FD_{dev}$ | Model performance and significant predictors for $FD_{dev}$ |         |       |
|--------------|----------------------------------------------------------------|-------------------------------------------------------------|-------------------------------------------------------------|---------|-------|
|              |                                                                |                                                             | estimates                                                   | $R^2_m$ | $P$   |
| <b>Birds</b> |                                                                |                                                             |                                                             |         |       |
| FRic         | + Temp + Insect + Spider                                       | ns                                                          | -                                                           | -       | -     |
| FEve         | - Prec                                                         | - Decid                                                     | -0.158                                                      | 0.026   | 0.05  |
| Rao          | <b>- Prec + Spider + Brows</b>                                 | <b>- Prec</b>                                               | -0.289                                                      | 0.183   | 0.001 |
|              |                                                                | - Insect                                                    | -0.140                                                      |         | 0.004 |
|              |                                                                | <b>+ Brows</b>                                              | 0.089                                                       |         | 0.05  |
| CWM mass     | <b>+ Temp - Prec + Spider</b>                                  | <b>+ Temp</b>                                               | 0.126                                                       | 0.115   | 0.05  |
|              |                                                                | <b>- Prec</b>                                               | -0.128                                                      |         | 0.02  |
|              |                                                                | - Treerao                                                   | -0.061                                                      |         | 0.05  |
|              |                                                                | <b>+ Spider</b>                                             | 0.066                                                       |         | 0.05  |
| <b>Bats</b>  |                                                                |                                                             |                                                             |         |       |
| FRic         | - Stratif                                                      | - Earth                                                     | -0.258                                                      | 0.097   | 0.005 |
| FEve         | + Undric + <b>Insect</b>                                       | <b>+ Insect</b>                                             | 0.304                                                       | 0.069   | 0.006 |
| Rao          | - Stratif                                                      | - Earth                                                     | -0.241                                                      | 0.083   | 0.004 |
| CWM mass     | <b>- Decid + Brows - Earth</b>                                 | <b>- Decid</b>                                              | -0.113                                                      | 0.142   | 0.01  |
|              |                                                                | <b>+ Brows</b>                                              | 0.075                                                       |         | 0.05  |
|              |                                                                | <b>- Earth</b>                                              | -0.122                                                      |         | 0.05  |

**Table S6.** Comparison between significant predictors for observed and expected  $FD_{dev}$  values based on 1000 random permutations of the data trait table. The similar predictors in both models are indicated in bold.

## References

- Calba, S, Maris, V, Devictor, V. 2014 Measuring and explaining large-scale distribution of functional and phylogenetic diversity in birds: separating ecological drivers from methodological choices. *Global Ecology and Biogeography*, 23, 669–678.
- Laliberté, E, Legendre P. 2010 A distance-based framework for measuring functional diversity from multiple traits. *Ecology* 91:299-305.
- Pellissier, V, Barnagaud, JY, Kissling, WD, Şekercioglu, C, Svenning, JC. 2018 Niche packing and expansion account for species richness-productivity relationships in global bird assemblages. *Global Ecology and Biogeography* 27: 604–615.



## **Supplement S7. Sampling habitat and biotic predictors**

### **(a) Vegetation sampling**

Understorey vegetation was sampled between May and August 2012 in all forest plots. The percentage cover of all vascular plant species < 1.3 m in height was recorded in three 5×5 m subplots. The cover data for individual plant species were summed per subplot and averaged over the three subplots as a proxy for plot-level understorey abundance. The corresponding understorey species richness was used as a measure of plot-level understorey diversity. Forest overstorey composition was estimated as relative proportions of coniferous and deciduous trees, and we computed a Shannon index of vertical stratification based on averaged percentage cover of each stratum of vegetation, i.e., trees, shrubs, understorey and bare soil. We calculated an index of tree functional diversity for each plot, using a set of 9 tree functional traits: tree life span, tree height, leaf type (deciduous/evergreen) and specific leaf area (SLA), obtained from the LEDA trait base, and seed mass, root depth and foliar %N, %C and Ca contents measured from fresh leaves collected in the six regions during the study. For this, we calculated Rao's functional entropy as an abundance-weighted measure of tree functional diversity (total basal area per species was used as the measure of tree abundance) using the 'FD' R-package.

### **(b) Defoliating insect sampling**

Defoliating insect activity was estimated by sampling leaf herbivory (leaf area loss or shoot mortality) on six individual trees per species in monocultures and three individual trees per species in mixed plots in spring and summer 2012 (Italy, Germany and Finland) and 2013 (Spain, Romania and Poland). Insect herbivory was estimated using the mean percentage crown damage over all trees for a given plot. To confirm that crown defoliation was owing to insect damage, herbivory was assessed on a leaf sample collected on each studied tree.

### **(c) Spider sampling**

Spider abundance was sampled by foliage-beating method in spring and summer 2012 (Italy, Germany and Finland) and 2013 (Spain, Romania and Poland). In each forest plot, we selected four 'beating units' (i.e., a sapling or a low branch of adult tree) per target tree species in mixed plots and six units in monocultures. Each unit was beaten for spiders to fall on a 1×1 m screen located below the sampled foliage until no more new spiders were detected. All spider individuals collected were stored in 70% alcohol before being aged and identified. We used the total abundance of all adult and juvenile individuals per forest plot, since both life stages can be consumed by birds and bats.

### **(d) Earthworm sampling**

Earthworms are both prey items for ground probing forest birds and contributing to overall biotic activity in forest soils by improving soil structure. Earthworm abundance was sampled in a central 10×10 m subplot in each forest plot in spring 2012 in Italy, Germany and Finland, and in autumn 2012 in Poland, Romania and Spain. We hand sorted litter over an area of 25×25 cm for epigeic earthworm species and removed litter over a larger area of 100×50 cm with mustard extraction of the soil for anecic species. We then hand sorted a soil sample of 25×25 cm and 20 cm depth from the middle of the 100×50 cm area for endogeic species. All earthworm individuals were summed per unit area and sampling method to determine total earthworm abundance at the plot level.

### **(e) Ungulate browsing**

We measured browsing intensity by large mammal herbivores as a key non-trophic interaction affecting understorey structure and composition for forest birds and bats. Browsing intensity was estimated on understorey vegetation between 0.2 m and 3.0 m height, where ungulates

tend to browse predominantly and have the highest impact. It was assessed within four 5×5 m subplots established within each forest plot, where all woody species individuals were visually inspected for browsing damage. We estimated the percentage of biomass removed wherever evidence of browsing was found, and browsing intensity per plot was calculated as the mean biomass removed per plant individual, averaged over the four subplots.
